# Supplementary material for: Dysfunctional interactions between the default mode network and the dorsal attention network in subtypes of amnestic mild cognitive impairment
Source: publisher site journal article supplement (doi:10.18632/aging.102380), 2019-10-24
Supplement: Supplementary file [file aging-v11i20-102380-supplementary-material-SD2.pdf]

## SUPPLEMENTARY TABLES

**Supplementary Table 1. Altered anticorrelations between the DMN and DAN among the four groups.**

| Seed             | Brain regions | BA | side | Cluster size | F value | Peak MNI coordinates |     |    |
|------------------|---------------|----|------|--------------|---------|----------------------|-----|----|
|                  |               |    |      |              |         | X                    | Y   | Z  |
| <b>Left PCC</b>  |               |    |      |              |         |                      |     |    |
| MCI-s < AD       | IPS           | 40 | L    | 10           | 11.09   | -42                  | -36 | 38 |
| MCI-s < MCI-m    | IPrCS         | 6  | L    | 12           | 13.07   | -54                  | 10  | 36 |
| MCI-s < NC       | IPrCS         | 6  | L    | 22           | 17.76   | -54                  | 10  | 38 |
| <b>Left mPFC</b> |               |    |      |              |         |                      |     |    |
| MCI-m < NC       | SOG           | 19 | R    | 12           | 9.82    | 34                   | -82 | 30 |
| <b>Left FEF</b>  |               |    |      |              |         |                      |     |    |
| MCI-s < AD       | Ventral PCC   | 23 | R    | 107          | 13.56   | 6                    | -52 | 36 |
| <b>Left IPS</b>  |               |    |      |              |         |                      |     |    |
| MCI-m < AD       | Dorsal PCC    | 31 | R    | 14           | 8.91    | 4                    | -48 | 42 |

Abbreviations: R: Right, L: left. MNI: Montreal Neurological Institute; BA: Brodmann areas; PCC: posterior cingulate cortex; IPS: intraparietal sulcus; FEF: frontal eye fields; mPFC: medial prefrontal cortex; IPrCS: inferior precentral sulcus; SOG: superior occipital gyrus; AD: Alzheimer's disease; aMCI-s: single-domain of amnesic mild cognitive impairment; aMCI-m: multiple-domain of amnesic mild cognitive impairment; NC: normal controls.

**Supplementary Table 2. Altered functional connectivity within the DMN and DAN among the four groups.**

| Network       | Brain regions     | BA   | Side | Cluster size | F value | Peak MNI coordinates |     |    |
|---------------|-------------------|------|------|--------------|---------|----------------------|-----|----|
|               |                   |      |      |              |         | X                    | Y   | Z  |
| <b>DMN</b>    |                   |      |      |              |         |                      |     |    |
| AD < MCI-m    | PCC/ RSC          | 30   | R    | 16           | 13.47   | 10                   | -40 | 8  |
|               | PCC/PCL           | 31/5 | R    | 30           | 11.84   | 6                    | -36 | 50 |
| AD < NC       | Precuneus         | 7    | R    | 27           | 14.51   | 10                   | -76 | 54 |
|               | RSC               | 30   | R    | 11           | 9.05    | 12                   | -42 | 12 |
| AD > NC       | MOG               | 19   | R    | 58           | 12.63   | 40                   | -68 | 36 |
|               | V1                | 17   | R    | 12           | 10.11   | 4                    | -66 | 16 |
| MCI-m < NC    | precuneus         | 7    | R    | 72           | 12.45   | 6                    | -72 | 52 |
|               | Angular gyrus     | 39   | L    | 19           | 10.18   | -36                  | -70 | 50 |
| MCI-m > NC    | Lingual gyrus     | 19   | R    | 21           | 16.53   | 12                   | -42 | 0  |
|               | Precuneus         | 7    | L    | 23           | 11.41   | -5                   | -54 | 44 |
|               | MOG               | 19   | R    | 14           | 8.82    | 40                   | -70 | 32 |
| MCI-s < NC    | Angular gyrus     | 39   | L    | 25           | 10.20   | -42                  | -56 | 48 |
| MCI-s > NC    | Precuneus         | 7    | L    | 46           | 11.18   | -12                  | -54 | 48 |
| <b>DAN</b>    |                   |      |      |              |         |                      |     |    |
| AD < MCI-s    | Postcentral gyrus | 1    | R    | 22           | 13.52   | 34                   | -42 | 72 |
| AD > MCI-s    | IPL               | 40   | R    | 27           | 13.00   | 36                   | -50 | 50 |
| AD < NC       | Postcentral gyrus | 1    | R    | 87           | 17.93   | 52                   | -30 | 56 |
|               | Postcentral gyrus | 3    | R    |              | 11.35   | 44                   | -32 | 60 |
|               | Postcentral gyrus | 2    | R    | 18           | 10.65   | 24                   | -46 | 60 |
| MCI-m < MCI-s | SMG               | 40   | R    | 26           | 10.52   | 48                   | -32 | 44 |
|               | Postcentral gyrus | 3    | R    |              | 8.83    | 42                   | -26 | 42 |

Abbreviations: R = Right, L = left. MNI: Montreal Neurological Institute; BA: Brodmann areas; DMN: default mode network; DAN: dorsal attention network; PCC: posterior cingulate cortex; RSC: retrosplenial cortex; PCL: paracentral lobule; V1: primary visual cortex; MOG: middle occipital gyrus; IPL: inferior parietal lobule; SMG: supramarginal gyrus; AD: Alzheimer's disease; aMCI-s: single-domain of amnesic mild cognitive impairment; aMCI-m: multiple-domain of amnesic mild cognitive impairment; NC: normal controls.
